1 **Common genetic variant of GC associated with vitamin D deficiency in a Chinese**  
2 **population in the Netherlands**

3

4

5 Ping Wai Man<sup>1</sup>, Stefan Böhringer<sup>2</sup>, Elisa J.F. Houwink<sup>1</sup>, Wenzhi Lin<sup>3</sup>, Mattijs E. Numans<sup>1</sup>,  
6 Paul Lips<sup>4</sup>, Barend J. C. Middelkoop<sup>1,5</sup>

7

8

9 <sup>1</sup>Department of Public Health and Primary Care,  
10 Leiden University Medical Center,  
11 Leiden, the Netherlands

12

13 <sup>2</sup>Medical Statistics, Department of Biomedical Data Sciences,  
14 Leiden University Medical Center,  
15 Leiden, the Netherlands

16

17 <sup>3</sup>Medical Center Balans,  
18 The Hague, the Netherlands

19

20 <sup>4</sup>Department of Internal Medicine, Endocrine Section,  
21 Amsterdam UMC,  
22 Vrije Universiteit Amsterdam  
23 Amsterdam, the Netherlands

24

25 <sup>5</sup>Department of Epidemiology,  
26 Municipal Health Service Haaglanden,  
27 The Hague, the Netherlands

28

29

30

31 Corresponding author:  
32 P. W. Man,  
33 Department of Public Health and Primary Care,  
34 Leiden University Medical Center,  
35 PO Box 9600, 2300 RC Leiden,  
36 The Netherlands  
37 E-mail: [p.w.man@lumc.nl](mailto:p.w.man@lumc.nl)

38

39 **Abstract**

40

41 *Background* Genome-wide association studies among European populations have identified  
42 four single nucleotide polymorphisms (SNPs) in genes involved in vitamin D transport and  
43 metabolism affecting 25-hydroxyvitamin D [25(OH)D] concentration: rs2282679 in GC,  
44 rs6013897 near CYP24A1, rs10741657 near CYP2R1, and rs12785878 near DHCR7. It is,  
45 however, unknown whether the association with 25(OH)D can also be observed in a Chinese  
46 population living in the Netherlands.

47 *Methods* Observational study. Analyses were performed under an additive (univariate and  
48 multivariate) and genotypic model using logistic regression.

49 *Results* The C allele (minor allele frequency 0.28) of rs2282679 in GC was associated with  
50 vitamin D deficiency as defined by the Health Council of the Netherlands: 25(OH)D <30  
51 nmol/l (or <50 nmol/l for persons aged  $\geq 70$  years). Univariate and multivariate odds ratios,  
52 1.52 (95% CI 1.03, 2.24) and 1.57 (95% CI 1.04, 2.39), respectively, were not significant after  
53 Bonferroni correction. However, after extending the data by a meta-analysis, a significant  
54 association between C allele of rs2282679 and vitamin D deficiency (< 50 nmol/l) was  
55 observed (odds ratio 1.33; 95% CI 1.16, 1.52).

56 *Conclusion* Our findings suggest that, apart from sun exposure, lifestyle, and environmental  
57 factors, a common variant of GC may be associated with vitamin D deficiency.

58

59

60 **Keywords:** Genetic variant of GC, vitamin D deficiency, Chinese, Netherlands

61 ***Introduction***

62

63 Vitamin D is a fat-soluble vitamin synthesized in the skin when exposed to ultraviolet B  
64 radiation from sunlight from its precursor 7-dehydrocholesterol (pro-vitamin D). It undergoes  
65 hydroxylation in the liver by the enzyme vitamin D 25-hydroxylase (CYP2R1) into its major  
66 circulating, but biologically inactive, metabolite 25-hydroxyvitamin D [25(OH)D]. A further  
67 hydroxylation in the kidney by the enzyme 25(OH)D-1 $\alpha$ -hydroxylase (CYP27B1) produces  
68 its biologically active form 1,25-dihydroxyvitamin D [1,25(OH)<sub>2</sub>D] [1].

69

70 Vitamin D deficiency is common worldwide and is associated with adverse health outcomes  
71 [2-4]. The prevalence of hypovitaminosis D tends to be higher in Asian than in Caucasian  
72 populations [5, 6]. Although skin pigmentation, demographics, season of measurement,  
73 geographic latitude, lifestyle and cultural habits across populations partly could explain these  
74 differences, twin and family studies have suggested that genetic factors may also contribute to  
75 variability in 25(OH)D concentration. Heritability estimates of serum 25(OH)D  
76 concentrations varied worldwide from 20 to 80% [7-10]. By contrast, the overall estimate of  
77 heritability of serum 25(OH)D concentrations attributable to single-nucleotide polymorphisms  
78 (SNPs) as identified in genome-wide association studies (GWASs) and conducted among  
79 populations of European ancestry was only 7.5% [11].

80

81 SNPs at four loci in or near genes involved in vitamin D transport and metabolism associated  
82 with 25(OH)D concentrations were identified in GWASs: group-specific component (GC)  
83 (vitamin D-binding protein), the 24-hydroxylase gene (CYP24A1), the 25-hydroxylase gene  
84 (CYP2R1) and the 7-dehydrocholesterol reductase gene (DHCR7). Whereas GC encodes  
85 vitamin D-binding protein involved in transport of 25(OH)D, CYP24A1 encodes 24-

86 hydroxylase that initiates degradation of 25(OH)D and 1,25(OH)<sub>2</sub>D, CYP2R1 encodes  
87 vitamin D 25-hydroxylase involved in hepatic 25-hydroxylation, and DHCR7 encodes the  
88 enzyme 7-dehydrocholesterol reductase which converts the vitamin D precursor 7-  
89 dehydrocholesterol into cholesterol, thereby removing substrate for synthesis of vitamin D.  
90 Strong genome-wide associations with 25(OH)D concentrations were found at three loci in  
91 the discovery cohorts, and were confirmed in the replication cohorts: rs2282679 in GC,  
92 rs10741657 near CYP2R1, and rs12785878 near DHCR7 [12, 13]. An additional locus,  
93 rs6013897 near CYP24A1, was genome-wide significant in the pooled sample [13]. In a  
94 recently conducted expanded GWAS, an association between all four loci and 25(OH)D  
95 concentration was found [11].

96

97 Associations of the genetic variants influencing 25(OH)D levels were all identified in  
98 populations of European ancestry. The objective of this study was to explore associations in a  
99 sample of 418 Chinese adults living in the Netherlands. As associations with vitamin D  
100 deficiency depend on the threshold of 25(OH)D used, and since there is no consensus on the  
101 optimal threshold, we explored data using two cut-off points of 25(OH)D for deficiency:  
102 according to the recommendations of the Health Council of the Netherlands (HCN), i.e. 30  
103 nmol/l for persons <70 years and 50 nmol/l for persons ≥70 years [14], and 50 nmol/l which  
104 most government guidelines recommend as the threshold for bone health [15].

105

106

## 107 ***Materials and Methods***

108

### 109 *Study population*

110 This study was part of an observational study on the vitamin D status in a Chinese population  
111 in the Netherlands and described in details elsewhere [6]. Briefly, 418 persons aged  $\geq 18$  years  
112 with a Chinese background (i.e. when they, or at least one parent, were born in mainland  
113 China, Hong Kong or Taiwan) and living in the Netherlands participated in the study.  
114 Participants were recruited through Chinese welfare, elderly and women organizations and  
115 social media in the four cities of the Netherlands with the largest Chinese communities  
116 (Rotterdam, Amsterdam, The Hague, and Utrecht).

117

118 This study was conducted according to the guidelines laid down in the Declaration of Helsinki  
119 and all procedures involving research study participants were approved by the Medical  
120 Ethical Committee of the Leiden University Medical Center (approval number P13.279).

121 Written informed consent was obtained from all participants.

122

### 123 *SNP selection and genotyping*

124 We selected four SNPs based on previous GWASs [11-13]. Baseline measurements of blood  
125 samples were obtained in March 2014. After overnight fasting, blood was drawn for DNA  
126 isolation and genotyping, and measurement of 25(OH)D. DNA was isolated using standard  
127 salting-out procedures at the Erasmus MC laboratory Rotterdam (the Human Genotyping  
128 Facility, HuGE-F, at the department of Internal Medicine). For genotyping, validated Taqman  
129 assays from ThermoFisher were used for all SNPs (rs12785878, rs10741657, rs6013897, and  
130 rs2282679). Genotyping reactions were performed in a 384-wells format containing 2 ng  
131 DNA, 1x Taqman assay (ThermoFisher) and 1 x genotyping master mix (ABgene). PCR  
132 cycling consisted of initial denaturation for 10 min at 95°C, and 40 cycles with denaturation  
133 of 15 sec at 95°C and annealing and extension for 60 sec at 60°C. Signals were read with the  
134 Taqman 7900HT (Applied Biosystems Inc.) and analysed using the sequence detection

135 system 2.3 software (Applied Biosystems Inc.). To evaluate genotyping accuracy, 16 (4%)  
136 random samples were re-genotyped, leading to identical genotypes in all cases.

137

### 138 *Measurement of serum 25(OH)D levels*

139 Serum 25(OH)D concentrations were measured by isotope dilution/online solid-phase  
140 extraction liquid chromatography-tandem mass spectrometry (ID-XLC-MS/MS) [16] at the  
141 Endocrine Laboratory of the Amsterdam UMC, Vrije Universiteit Amsterdam. The limit of  
142 quantitation (LOQ) was 4.0 nmol/l, intra-assay coefficient of variation (CV) was <6%, and  
143 inter-assay CV was <8% for concentrations of 25-180 nmol/l.

144

### 145 *Anthropometric measurements*

146 Height (cm) and weight (kg) were measured in standing position and wearing light clothing  
147 and no shoes. The body mass index (BMI, kg/m<sup>2</sup>) was calculated as body weight divided by  
148 squared body height. Waist circumference (WC) was measured with a flexible tape all around  
149 the body at the level of the navel over thin clothing.

150 Physical activity was self-reported as a binary variable and defined as a moderate strenuous  
151 effort of at least 30 min per day, e.g., walking, cycling, or gardening, or activity below that  
152 level.

153

154

### 155 *Statistical Analysis*

156

#### 157 *Primary analysis*

158 The characteristics of the participants are presented according to cut-off points of 25(OH)D as  
159 recommended by the HCN and by the majority of government guidelines (50 nmol/l).

160 Continuously distributed variables were compared by One-way ANOVA and categorical  
161 variables using Chi-square test. Deviation from Hardy-Weinberg equilibrium (HWE) was  
162 assessed by a goodness-of-fit Chi-square test. To examine the associations between genetic  
163 variants of vitamin D and vitamin D deficiency, also the aforementioned two cut-off points  
164 were used.

165 Analyses of genetic variants of vitamin D were performed under an additive model (using the  
166 count of one of the alleles as continuous covariate) as well as a genotypic model (individual  
167 effect of each genotype with respect to one homozygous reference genotype). As our main  
168 analysis, univariate analysis was performed to separately examine the SNPs (continuous  
169 variables) as predictors of vitamin D deficiency. In total, four SNPs were analysed. To  
170 evaluate the joint effects of SNPs, we also conducted multivariate analyses including all SNPs  
171 (independent variables) in a single model. Initially, genotypic, univariate and multivariate  
172 models were adjusted for age, sex, body mass index (BMI) and physical activity. A second  
173 model, without BMI and physical activity as covariates, was very similar to the fully adjusted  
174 models and, therefore, we only present this simpler model.

175

#### 176 *Meta-analysis*

177 For the meta-analysis, a search for suitable studies was performed in electronic databases  
178 PubMed and Web of Science up to November 13 2019, using key terms “vitamin D binding  
179 protein” and “Chinese” with the combination of “vitamin D deficiency”. As a result, two  
180 studies were selected and the odds ratio (OR) of our finding of the C-allele of rs2282679 in  
181 GC for the association with vitamin D deficiency [25(OH)D <50 nmol/l] was meta-analysed  
182 (fixed-effect model) with those of Chinese people living in Hong Kong [17] and Dali (south-  
183 west China) [18].

184 Results are expressed as OR with their corresponding 95% confidence interval (CI), or *P*-  
185 values. As a nominal level, a *P*-value of <0.05 was considered to be statistically significant.  
186 To account for multiple testing, a *P*-value of 0.004 (0.05/12) was used as a significance  
187 threshold to determine overall significance using Bonferroni correction for testing 12  
188 comparisons. Analyses were performed using IBM SPSS Statistics for Windows, Version 23  
189 (IBM Corp. Armonk, NY, USA), and the Open Meta-Analyst software, Brown University,  
190 Providence, RI, USA [19].

191

192

### 193 **Results**

194

195 Our study included a total of 418 individuals with a Chinese background of whom 416  
196 completed serum 25(OH)D measurement (103 men and 313 women); mean age was  $56.3 \pm$   
197 12.1 years. Men had lower median serum 25(OH)D concentration than women (42.0 and 47.0  
198 nmol/l, respectively,  $P = 0.046$ ) and higher BMI (25.4 and 23.9 kg/m<sup>2</sup>, respectively,  $P$   
199 <0.001) (data not shown). Table 1 shows the characteristics of the participants according to  
200 two different cut-off points for vitamin D deficiency: the criteria of the HCN (30 nmol/l for  
201 persons <70 years; 50 nmol/l for persons  $\geq 70$  years), and a general cut-off of 50 nmol/l (as  
202 used in most government guidelines). The prevalence of vitamin D deficiency according to  
203 the criteria of the HCN was observed in 23% of the population, and in almost 57% when  
204 vitamin D deficiency was defined as 25(OH)D <50 nmol/l. Participants with serum 25(OH)D  
205 concentrations  $\geq 50$  nmol/l were older and reported significantly more physical activity ( $\geq 3$   
206 days per week moderate strenuous effort for at least 30 min per day) compared to participants  
207 with serum 25(OH)D levels <50 nmol/l (Table 1).

208



209 Invalid measurements of DNA were observed in 46 (11.0%) of the samples of rs2282679, 34  
210 (8.2%) of rs6013897, 37 (8.9%) of rs10741657, and 50 (12.0%) of rs12785878 (data not  
211 shown).

212 The frequencies of rs2282679, rs6013897, and rs10741657 did not deviate from HWE  
213 proportions ( $P_{HWE} = 0.169$ ,  $P_{HWE} = 0.758$ ,  $P_{HWE} = 0.974$ , respectively); however, rs12785878  
214 deviated significantly ( $P_{HWE} = 7.120e-5$ ) (Table 2).

215 The minor allele frequency (MAF) of the C allele of rs2282679 in our study population (0.28)  
216 was in line with the frequency of 0.26 as described for East Asian populations in the 1,000  
217 Genome Project Phase 3.

218 In the univariate model, the minor C allele of rs2282679 in GC gene was associated with  
219 vitamin D deficiency as defined by the criteria of the Dutch guidelines. Results of the  
220 multivariate analyses were not appreciably different from univariate analyses. However, after  
221 Bonferroni correction for four SNPs and three genotypes, no significant associations were  
222 detected anymore at the significance level of 0.004.

223 At the 25(OH)D cut-off point for vitamin D deficiency of 50 nmol/l, no association between  
224 any allele of the SNPs examined and vitamin D deficiency was found in either the univariate  
225 or the multivariate model (Table 2). However, a meta-analysis ( $N \approx 2280$ ) of the ORs of the C  
226 allele of rs2282679 of the GC gene in Chinese populations from Hong Kong, Dali (south-west  
227 China), and our study population, showed a significant overall OR (1.33, 95% CI 1.16, 1.52)  
228 of having vitamin D deficiency [25(OH)D <50 nmol/l] (Fig. 1).

229 The genotypic model showed that heterozygous carriers of rs2282679 (AC) and homozygous  
230 carriers of the minor allele (AA) of rs6013897 and rs10741657 had higher risk of having  
231 vitamin D deficiency as defined by the HCN (OR = 2.30, 95% CI 1.37, 3.87; OR = 9.13, 95%  
232 CI 1.72, 48.47; OR = 2.14, 95% CI 1.02, 4.47, respectively) (Table 2). After Bonferroni

233 correction, only heterozygous carriers of rs2282679 (AC) remained significant at the  
234 significance level of 0.004.  
235 Serum 25(OH)D concentrations of the homozygous carriers of the major allele (TT) and the  
236 heterozygous carriers (TA) of rs6013897 were significantly higher than of the homozygous  
237 carriers of the minor allele (AA) ( $P < 0.01$ ). Of all other SNPs no difference in serum  
238 25(OH)D concentration between homozygous carriers of the major and minor allele, and  
239 heterozygous carriers was observed (Table 2).  
240 Results from an additionally performed linear regression analysis between the four SNPs  
241 under study and serum 25(OH)D concentration were not significant (data not shown).

242

243

#### 244 ***Discussion***

245

246 Previous GWASs have shown that four genetic variants in or near genes involved in vitamin  
247 D transport and metabolism (rs2282679 in GC, rs6013897 near CYP24A1, rs10741657 near  
248 CYP2R1, and rs12785878 near DHCR7) can influence 25(OH)D concentration and may  
249 identify individuals with elevated risk for low concentrations of serum 25(OH)D [11-13].  
250 The present study aimed to explore the association between these genetic variants in the  
251 vitamin D pathway and vitamin D deficiency in a sample of Chinese adults living in the  
252 Netherlands. An association was observed between the minor C allele of rs2282679 in GC  
253 and vitamin D deficiency as defined by the HCN, but this did not remain significant after  
254 Bonferroni correction.  
255 Studies performed among Chinese Hans from Beijing and Shanghai [20], and north-eastern  
256 Han Chinese children (0-14 years) [21] showed that variants in GC and DHCR7 genes were  
257 associated with lower levels of serum 25(OH)D. The C allele of rs2282679 in GC was

258 associated with increased risk of vitamin D deficiency [25(OH)D <50 nmol/l], as was also  
259 demonstrated in previous GWASs [11-13], in a GWAS replication study among Hong Kong  
260 Chinese women [17] and in a study performed in Dali, south-west China [18]. In the present  
261 study, the C allele of rs2282679 in GC was not significantly associated with risk of vitamin D  
262 deficiency for the 50 nmol/l cut-off, although the OR was comparable to the significant  
263 finding for the Health Council of the Netherlands recommended cut-off. Increasing power by  
264 combining studies in a meta-analysis of our findings with the aforementioned studies  
265 performed in Hong Kong and Dali, the overall OR reached the level of significance. Outside  
266 of Europe and China, an association between the C allele of rs2282679 in GC gene and  
267 vitamin D deficiency [25(OH)D <50 nmol/l] was reported in a study among 689 Mexican  
268 postmenopausal women [22]. This indicates that effects might interact with ethnicity. On the  
269 other hand, environmental influences seem less pronounced as our meta-analysis showed ORs  
270 between 1.16 and 1.51 while environmental conditions varied considerably (mainland China,  
271 Hong Kong, the Netherlands). Effect size as reported in previous GWASs varied between  
272 1.49 [25(OH)D <50 nmol/l for vitamin D insufficiency] [13] and 1.83 [25(OH)D <25 nmol/l  
273 for vitamin D deficiency] [12], and in the aforementioned Mexican study the OR was 1.53  
274 [25(OH)D <50 nmol/l for vitamin D deficiency], indicating some interaction between genetic  
275 background and SNP effect.

276 The clinical significance of SNP rs2282679 in GC gene is, however, uncertain. Although  
277 25(OH)D will be less bound to vitamin D-binding protein due to lower concentrations of GC,  
278 it might be that the free fraction of 25(OH)D is normal in persons with this SNP. Recently, a  
279 case report study described a patient with complete vitamin D-binding protein deficiency  
280 caused by homozygous deletion of the GC gene, resulting in an apparent severe vitamin D  
281 deficiency. However, only mild bone disease (osteopenia) and fragility fractures were  
282 observed in this patient [23]. Therefore, further research in various groups is needed,

283 examining the relationship between genetic variants in GC gene and free 25(OH)D  
284 concentration.

285 Regarding the other SNPs examined, results are inconsistent. One study [21] showed a  
286 positive association of CYP2R1 rs2060793 with serum 25(OH)D levels, while another study  
287 [20] could only show a trend towards an association in a Shanghai subpopulation. By contrast,  
288 two other Chinese studies [18, 24] found variants of CYP2R1 not to be significantly  
289 associated with 25(OH)D levels. Two of the aforementioned studies [20, 21] also found  
290 variants of DHCR7 associated with lower levels of serum 25(OH)D, while a study conducted  
291 in Hong Kong [17] observed no association between DHCR7 rs12785878 and serum  
292 25(OH)D levels.

293 In the present study, associations between variants of CYP2R1, CYP24A1, and DHCR7 and  
294 vitamin D deficiency or serum 25(OH)D concentration were not observed. There may be  
295 several explanations for the inconsistency of study findings. First, residing in different regions  
296 in China may imply a substantial difference in genetic background [25]. In our study, we  
297 represent a diverse Chinese population [87% born in mainland China, Hong Kong or Taiwan,  
298 7% born in the Netherlands, 6% born elsewhere; mean residence time in the Netherlands 30.5  
299 (11.3) years] with possible different genetic and cultural backgrounds which may have  
300 influenced study results. Second, the relatively small sample size, which is a limitation of our  
301 study, may have prevented us from demonstrating small effects. Moreover, in almost 10% of  
302 our samples, DNA measurement was invalid, possibly due to technical issues with the blood  
303 collection of the participants, thereby even more reducing sample size. Third, differences in  
304 serum 25(OH)D measurement techniques may have played a role in the discrepancies in  
305 results, as different assays of serum 25(OH)D from different laboratories may not be assumed  
306 to be comparable [16].

307 Furthermore, in general, candidate gene studies may have several pitfalls. First, they are  
308 largely restricted by prior knowledge, and results of identified associated SNPs by candidate  
309 gene studies may not reflect the examined variant, but the effect of a nearby causal variant  
310 [26]. It could also be that genes other than those involved in transport and metabolism, but not  
311 selected due to lack of prior knowledge, had an effect on serum 25(OH)D concentrations [11].  
312 Finally, false-positive results cannot be excluded, especially when multiple testing corrections  
313 have not been rigorously applied.

314 Genetic studies of vitamin D status are, nevertheless, potentially clinically relevant. It may  
315 help clinicians in counselling, screening, diagnosis, and treatment of patients with vitamin D  
316 deficiency and may be helpful in risk profiling for, e.g., osteoporosis. Therefore, in the future,  
317 it may help personalized health management as it may identify individuals or groups who  
318 would benefit most from supplementation, e.g., Chinese populations living in northern  
319 countries, or who are at risk for deficiency, which is important in view of numerous diseases  
320 associated with reduced 25(OH)D levels.

321 Our study has several limitations. The relatively small sample size may have prevented us  
322 from finding associations in genes other than GC. Also, possible family relationships between  
323 participants were unknown and might have influenced the calculation of *P*-values. As the  
324 study was observational, causal associations cannot be established. Moreover, our findings in  
325 the multivariate analysis should be interpreted with caution as rs12785878 near DHCR7  
326 deviated significantly from HWE. The reason is unclear. A possible explanation is a  
327 genotyping error, although no problems during DNA isolation or genotyping could be  
328 identified. Furthermore, our meta-analysis was on the basis of only three observational  
329 studies, which carries the risk of bias. However, all studies adjusted for age, and two out of  
330 the three studies also adjusted for sex; the third study only included women. Moreover, the  
331 odds ratios were of very comparable magnitude. Finally, our findings are not generalizable to

332 other Chinese populations as genetic make-up may differ among Chinese depending on  
333 population structure and geographic origin of the participants [25]. Strength of our study was  
334 that no influence of season was present, as all measurements were performed in March 2014.  
335 In conclusion, this study found the C allele of rs2282679 in GC gene associated with vitamin  
336 D deficiency. Associations between the other SNPs and vitamin D deficiency or between  
337 SNPs and serum 25(OH)D concentration were not observed.

## **Acknowledgments**

The authors thank all responders for their participation and all volunteers for their efforts.

The authors gratefully acknowledge financial support from ‘Stichting Artrose Zorg’ and ‘Fonds voor het Hart’. Also, the authors thank Dr. Li-Hua Li (Dali University School of Clinical Medicine, China) for sharing their data, Professor André Uitterlinden (Department of Internal Medicine, Erasmus MC, University Medical Center, Rotterdam, the Netherlands) for proofreading the manuscript and Ramazan Buyukcelik and Pascal Arp (Department of Internal Medicine, Erasmus MC, University Medical Center, Rotterdam, the Netherlands) for technical assistance.

## **Conflict of interest**

Paul Lips has received a lecture fee from Abiogen.

The other authors declare that they have no conflict of interest.

## **Author contributions**

P.W.M., study design, data collection, data analysis, manuscript preparation; S.B., data analysis, manuscript preparation; E.J.F.H., data analysis, manuscript preparation; W.L., data collection, manuscript preparation; M.E.N., study design, manuscript preparation; P.L., study design, data analysis, manuscript preparation; B.J.C.M., study design, data analysis, manuscript preparation. All authors revised the manuscript for important intellectual content.

### **Data availability**

The data that support the findings of this study are available from the corresponding author upon reasonable request.



## References

1. Lips P. Vitamin D physiology. *Prog Biophys Mol Biol.* 2006;92:4-8.
2. Bikle DD. Extraskelatal actions of vitamin D. *Ann N Y Acad Sci.* 2016;1376:29-52.
3. Pludowski P, Holick MF, Grant WB, Konstantynowicz J, Mascarenhas MR, Haq A, et al. Vitamin D supplementation guidelines. *J Steroid Biochem Mol Biol.* 2018;175:125-35.
4. Wimalawansa SJ. Non-musculoskeletal benefits of vitamin D. *J Steroid Biochem Mol Biol.* 2018;175:60-81.
5. Lips P. Vitamin D status and nutrition in Europe and Asia. *J Steroid Biochem Mol Biol.* 2007;103:620-5.
6. Man PW, Lin W, van der Meer IM, Heijboer AC, Wolterbeek R, Numans ME, et al. Vitamin D status in the Chinese population in the Netherlands: The DRAGON study. *J Steroid Biochem Mol Biol.* 2016;164:194-8.
7. Arguelles LM, Langman CB, Ariza AJ, Ali FN, Dilley K, Price H, et al. Heritability and environmental factors affecting vitamin D status in rural Chinese adolescent twins. *J Clin Endocrinol Metab.* 2009;94:3273-81.
8. Choi S, Ko H, Lee K, Sung J, Song YM. Genetic influence on serum 25-hydroxyvitamin D concentration in Korean men: a cross-sectional study. *Genes Nutr.* 2018;13:33.
9. Engelman CD, Fingerlin TE, Langefeld CD, Hicks PJ, Rich SS, Wagenknecht LE, et al. Genetic and environmental determinants of 25-hydroxyvitamin D and 1,25-dihydroxyvitamin D levels in Hispanic and African Americans. *J Clin Endocrinol Metab.* 2008;93:3381-8.

10. Wjst M, Altmuller J, Braig C, Bahnweg M, Andre E. A genome-wide linkage scan for 25-OH-D(3) and 1,25-(OH)<sub>2</sub>-D<sub>3</sub> serum levels in asthma families. *J Steroid Biochem Mol Biol.* 2007;103:799-802.
11. Jiang X, O'Reilly PF, Aschard H, Hsu YH, Richards JB, Dupuis J, et al. Genome-wide association study in 79,366 European-ancestry individuals informs the genetic architecture of 25-hydroxyvitamin D levels. *Nat Commun.* 2018;9:260.
12. Ahn J, Yu K, Stolzenberg-Solomon R, Simon KC, McCullough ML, Gallicchio L, et al. Genome-wide association study of circulating vitamin D levels. *Hum Mol Genet.* 2010;19:2739-45.
13. Wang TJ, Zhang F, Richards JB, Kestenbaum B, van Meurs JB, Berry D, et al. Common genetic determinants of vitamin D insufficiency: a genome-wide association study. *Lancet.* 2010;376:180-8.
14. Health Council of the Netherlands. Evaluation of the dietary reference values for vitamin D. Publication no. 2012/15E. The Hague: Health Council of the Netherlands; 2012.
15. Bouillon R, Carmeliet G. Vitamin D insufficiency: Definition, diagnosis and management. *Best Pract Res Clin Endocrinol Metab.* 2018;32:669-84.
16. Heijboer AC, Blankenstein MA, Kema IP, Buijs MM. Accuracy of 6 routine 25-hydroxyvitamin D assays: influence of vitamin D binding protein concentration. *Clin Chem.* 2012;58:543-8.
17. Cheung CL, Lau KS, Sham PC, Tan KC, Kung AW. Genetic variant in vitamin D binding protein is associated with serum 25-hydroxyvitamin D and vitamin D insufficiency in southern Chinese. *J Hum Genet.* 2013;58:749-51.

18. Li LH, Yin XY, Wu XH, Zhang L, Pan SY, Zheng ZJ, et al. Serum 25(OH)D and vitamin D status in relation to VDR, GC and CYP2R1 variants in Chinese. *Endocr J*. 2014;61:133-41.
19. Wallace BC, Dahabreh IJ, Trikalinos TA, Lau J, Trow P, Schmid CH. Closing the Gap between Methodologists and End-Users: R as a Computational Back-End. *Journal of Statistical Software*. 2012;49:1-15.
20. Lu L, Sheng H, Li H, Gan W, Liu C, Zhu J, et al. Associations between common variants in GC and DHCR7/NADSYN1 and vitamin D concentration in Chinese Hans. *Hum Genet*. 2012;131:505-12.
21. Zhang Y, Wang X, Liu Y, Qu H, Qu S, Wang W, et al. The GC, CYP2R1 and DHCR7 genes are associated with vitamin D levels in northeastern Han Chinese children. *Swiss Med Wkly*. 2012;142:w13636.
22. Rivera-Paredes B, Macias N, Martinez-Aguilar MM, Hidalgo-Bravo A, Flores M, Quezada-Sanchez AD, et al. Association between Vitamin D Deficiency and Single Nucleotide Polymorphisms in the Vitamin D Receptor and GC Genes and Analysis of Their Distribution in Mexican Postmenopausal Women. *Nutrients*. 2018;10:1175.
23. Henderson CM, Fink SL, Bassyouni H, Argiropoulos B, Brown L, Laha TJ, et al. Vitamin D-Binding Protein Deficiency and Homozygous Deletion of the GC Gene. *N Engl J Med*. 2019;380:1150-7.
24. Xu W, Sun J, Wang W, Wang X, Jiang Y, Huang W, et al. Association of genetic variants of vit D binding protein (DBP/GC) and of the enzyme catalyzing its 25-hydroxylation (DCYP2R1) and serum vit D in postmenopausal women. *Hormones(Athens)*. 2014;13:345-52.

25. Xu S, Yin X, Li S, Jin W, Lou H, Yang L, et al. Genomic dissection of population substructure of Han Chinese and its implication in association studies. *Am J Hum Genet.* 2009;85:762-74.
26. Dastani Z, Li R, Richards B. Genetic regulation of vitamin D levels. *Calcif Tissue Int.* 2013;92:106-17.

**Table 1.** Characteristics of the participants according to two different cut-off points for vitamin D deficiency

|                          | 25(OH)D cut-off point for vitamin D deficiency |                                            |                         |                    |                    |          |
|--------------------------|------------------------------------------------|--------------------------------------------|-------------------------|--------------------|--------------------|----------|
|                          | vitamin D deficient                            |                                            | not vitamin D deficient |                    |                    |          |
|                          | 25(OH)D <30 (<70 y) or <50 (≥70 y) nmol/l      | 25(OH)D ≥30 (<70 y) or ≥50 (≥ 70 y) nmol/l | <i>P</i>                | 25(OH)D <50 nmol/l | 25(OH)D ≥50 nmol/l | <i>P</i> |
| Age (years)              | 57.0 (14.1)                                    | 56.2 (11.5)                                | 0.599                   | 54.9 (12.9)        | 58.4 (10.9)        | 0.004    |
| Sex                      |                                                |                                            |                         |                    |                    |          |
| Men (%)                  | 24 (23.5)                                      | 78 (76.5)                                  | 0.892                   | 69 (67.6)          | 33 (32.4)          | 0.009    |
| Women (%)                | 70 (22.9)                                      | 236 (77.1)                                 |                         | 162 (52.9)         | 144 (47.1)         |          |
| Weight (kg)              | 61.6 (10.9)                                    | 60.8 (10.5)                                | 0.517                   | 61.7 (10.7)        | 60.1 (10.3)        | 0.123    |
| Height (cm)              | 159.0 (8.0)                                    | 158.2 (7.5)                                | 0.408                   | 159.2 (8.0)        | 157.2 (7.0)        | 0.008    |
| BMI (kg/m <sup>2</sup> ) | 24.3 (3.3)                                     | 24.3 (3.6)                                 | 0.882                   | 24.3 (3.2)         | 24.3 (3.9)         | 0.911    |
| Physical activity        |                                                |                                            |                         |                    |                    |          |
| < 3 days/week (%)        | 54 (22.3)                                      | 188 (77.7)                                 | 0.705                   | 152 (62.8)         | 90 (37.2)          | 0.003    |
| ≥ 3 days/week (%)        | 39 (23.9)                                      | 124 (76.1)                                 |                         | 78 (47.9)          | 85 (52.1)          |          |

Data are expressed as numbers (%) or means (SD)  
 BMI *body mass index*

**Table 2.** Odds ratios for the association between vitamin D genetic variants and vitamin D deficiency at two different cut-off points of 25(OH)D under a genotypic, univariate, and multivariate model (all models adjusted for age and sex; multivariate also for SNPs)

| Gene    | SNP        | Model           | N   | MAF   | $P_{HWE}$ | Mean 25(OH)D<br>± SD (nmol/l) | P      | 25(OH)D cut-off point for vitamin D deficiency |        |                   |      |
|---------|------------|-----------------|-----|-------|-----------|-------------------------------|--------|------------------------------------------------|--------|-------------------|------|
|         |            |                 |     |       |           |                               |        | 30 (<70 y) or 50 (≥70 y) nmol/l                |        | 50 nmol/l         |      |
|         |            |                 |     |       |           |                               |        | OR (95% CI)                                    | P      | OR (95% CI)       | P    |
| GC      | rs2282679  | Genotypic       |     |       | 0.169     |                               |        |                                                |        |                   |      |
|         |            | AA <sup>a</sup> | 187 |       |           | 56 ± 30                       |        | 1.0                                            |        | 1.0               |      |
|         |            | AC <sup>b</sup> | 161 |       |           | 52 ± 30                       | N.S.   | 2.30 (1.37, 3.87)                              | <0.01* | 1.30 (0.84, 2.02) | 0.24 |
|         |            | CC <sup>c</sup> | 24  | 0.281 |           | 53 ± 31                       |        | 1.04 (0.33, 3.26)                              | 0.95   | 1.05 (0.43, 2.56) | 0.91 |
|         |            | Univariate      |     |       |           |                               |        | 1.52 (1.03, 2.24)                              | 0.04*  | 1.16 (0.82, 1.64) | 0.41 |
|         |            | Multivariate    |     |       |           |                               |        | 1.57 (1.04, 2.39)                              | 0.03*  | 1.22 (0.84, 1.76) | 0.30 |
| CYP24A1 | rs6013897  | Genotypic       |     |       | 0.758     |                               |        |                                                |        |                   |      |
|         |            | TT <sup>a</sup> | 282 |       |           | 54 ± 29                       |        | 1.0                                            |        | 1.0               |      |
|         |            | TA <sup>b</sup> | 95  |       |           | 56 ± 32                       | <0.01* | 1.09 (0.62, 1.89)                              | 0.77   | 1.12 (0.69, 1.82) | 0.64 |
|         |            | AA <sup>c</sup> | 7   | 0.142 |           | 28 ± 16                       |        | 9.13 (1.72, 48.47)                             | <0.01* | 4.22(0.49, 36.01) | 0.19 |
|         |            | Univariate      |     |       |           |                               |        | 1.49 (0.94, 2.37)                              | 0.09   | 1.27 (0.82, 1.95) | 0.28 |
|         |            | Multivariate    |     |       |           |                               |        | 1.26 (0.75, 2.14)                              | 0.39   | 1.17 (0.73, 1.88) | 0.51 |
| CYP2R1  | rs10741657 | Genotypic       |     |       | 0.974     |                               |        |                                                |        |                   |      |
|         |            | GG <sup>a</sup> | 173 |       |           | 53 ± 30                       |        | 1.0                                            |        | 1.0               |      |
|         |            | GA <sup>b</sup> | 168 |       |           | 54 ± 28                       | N.S.   | 1.04 (0.62, 1.73)                              | 0.89   | 0.88 (0.57, 1.36) | 0.57 |
|         |            | AA <sup>c</sup> | 40  | 0.325 |           | 49 ± 30                       |        | 2.14 (1.02, 4.47)                              | 0.04*  | 1.25 (0.61, 2.60) | 0.54 |
|         |            | Univariate      |     |       |           |                               |        | 1.33 (0.94, 1.89)                              | 0.11   | 1.03 (0.75, 1.40) | 0.87 |
|         |            | Multivariate    |     |       |           |                               |        | 1.34 (0.90, 1.99)                              | 0.15   | 0.97 (0.69, 1.36) | 0.84 |
| DHCR7   | rs12785878 | Genotypic       |     |       | 7.120e-5  |                               |        |                                                |        |                   |      |

|                 |     |       |         |      |                   |      |                   |      |
|-----------------|-----|-------|---------|------|-------------------|------|-------------------|------|
| GG <sup>a</sup> | 151 |       | 56 ± 31 |      | 1.0               |      | 1.0               |      |
| TG <sup>b</sup> | 140 |       | 53 ± 29 | N.S. | 1.10 (0.62, 1.94) | 0.75 | 1.14 (0.71, 1.83) | 0.60 |
| TT <sup>c</sup> | 77  | 0.399 | 52 ± 21 |      | 1.83 (0.97, 3.42) | 0.06 | 1.09 (0.62, 1.92) | 0.77 |
| Univariate      |     |       |         |      | 1.33 (0.97, 1.83) | 0.08 | 1.06 (0.80, 1.39) | 0.70 |
| Multivariate    |     |       |         |      | 1.38 (0.98, 1.95) | 0.07 | 1.04 (0.78, 1.40) | 0.78 |

N.S. *not significant*,  $P_{HWE}$  *P-value for Hardy-Weinberg equilibrium*,  $*P < 0.05$   
<sup>a,b,c</sup> homozygous major allele, heterozygous, homozygous minor allele, respectively, in the genotypic model; MAF *minor allele frequency in study population*

## Figure legend

**Fig. 1** Forest plot of the C-allele of rs2282679 in GC gene associated with vitamin D deficiency [25(OH)D <50 nmol/l]



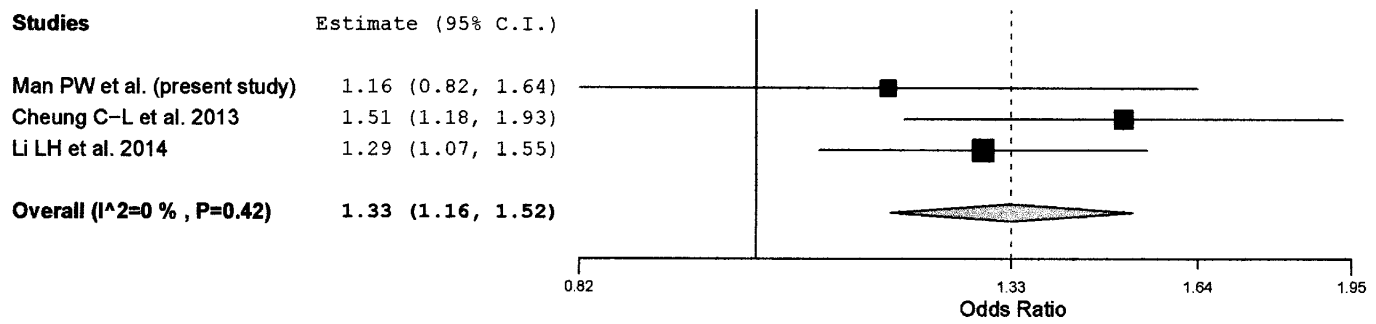

Source: https://www.medrxiv.org/content/medrxiv/early/2022/08/10/2022.08.08.22278561.full.pdf
